# Supplementary material for: Use and Overuse Leading the Conservation Issues of the Endangered Flagship Species <em>Artemisia granatensis</em>
Source: Preprints.org preprint supplement (doi:10.20944/preprints202410.0371.v1), 2024-10-07
Supplement: Supplementary file 1 [file supplementary]

## Sheet: Hoja1
ID_number	Year	page/s	Content (Spanish)	Content (English)	Author/s	Reference
1	ca. 1220		[sobre manzanilla real] "crece en las montañas más frías”	[about royal chamomile] “it grows in the coldest mountains ”	al-Baytar in Navarro & Hernández-Bermejo 1994	Navarro García M.A. & Hernández Bermejo J.E. 1994. Las manzanillas en los autores andalusíes: algunos apuntes para la interpretación de los textos. Ciencias de la Naturaleza en al-Andalus 3: 143-157
2	1754	64	[Veleta] "…no produciendo este terreno mas que Manzanilla real, polipodio y algunas puntas especie de amatistes o cristales fuertemente asidos a la superficie de las laxas"	[Veleta peak] “...producing this soil only Royal Chamomile, polypodium and some amethyst-like spikes or crystals strongly attached to the surface of the slabs”.	Ponz 1754	Ponz, A. 1754. Relación del viaje que desde Granada hizo á Sierra Nevada D. Antonio Ponz á influxo del Excmo. Sr. Marqués de la Ensenada. Mensajero económico y erudito de Granada, p. 25-30.
3	1802	98-99	Primera descripción científica de Artemisia granatensis (sub A. rupestris Lamark)	First scientific description of Artemisia granatensis (sub A. rupestris Lamark)	Lagasca & Rodríguez 1802	Lagasca M. & Rodríguez J. 1802. Descripción de algunas plantas que colectó D. Guillermo Thalacker en Sierra Nevada. Anales de Ciencias Naturales 5: 263-288.
4	1804-1809	122	Cita de Artemisia granatensis (sub Artemisia glacialis L.)	Citation of Artemisia granatensis (sub Artemisia glacialis L.)	Rojas-Clemente 2002	Rojas-Clemente, S. 2002. Viaje a Andalucia. Historia Natural del Reino de Granada (1804-1809). Transcripción de Antonio Gil Albarracín. Barcelona: G.B.G. Editora.
5	1820		Cita asignándola a una especies de genipíes de los Alpes (Artemisia genipi Weber, A. laxa Fritsch, A. glacialis L.)	Cite assigning it to a different "génépi" species from the Alps (Artemisia genipi Weber, A. laxa Fritsch, A. glacialis L.).	Bory San Vicent 1820	Bory de Saint-Vincent J.B.G.M. 1820. Florule de la Sierra Nevada ou catalogue des plantes observées dans une reconnniasance militaire faite de Grenade au sommet appelé Veleta. Annales Générales des Sciences Physiques 3: 3-16.
6	1838		Reconoce la planta como especie nueva (A. basilica Webb ex Willk & Lange), pero la tardanza en su publicación hace que, en 1838, sea el botánico suizo Boissier quien realice la primera descripción referencia a sus virtudes aromáticas y medicinales y a la gran reputación que tenía en la zona	Recognized the plant as a new species (A. basilica Webb ex Willk & Lange), but the delay in its publication makes that, in 1838, Swiss botanist Boissier was the first to describe it, referring to its aromatic and medicinal virtues and the great reputation it had in the area	Webb 1838	Webb P.B. 1838. Iter Hispaniense or a synopsis of plants collected in the southern provinces of Spain and in Portugal, with geographical remarks, and observations on rare and undescribed species. Paris, Londres.
7	1838		Primera descripción como especie nueva (Artemisia granatensis Boiss.) comenta su frecuencia en las cumbres de la Sierra y la gran cantidad de la planta que se observaba durante el verano en los mercados de la ciudad de Granada	First description as a new species (Artemisia granatensis Boiss.). He comments on its frequency in the summits of the Sierra and the large quantity of the plant that was observed during the summer in the markets of the city of Granada.	Boissier 1838	Boissier, E. 1838. Notice sur l'Abies pinsapo. Tiré de la Bibliothèque Universelle de Genève. Genève.
8	1845	278	Indica: "Artemisia granatensis a 8000 pies[2438 m]", comenta también: "se ven muy raramente en estas montañas"	Indicates: “Artemisia granatensis at 8000 ft [2438 m]”, also comments: “they are very rarely seen in these mountains”.	Boissier 1845	Boissier, E. 1839-1845. Voyage botanique dans le midi de l’Espagne pendant l’année 1837. Paris: Gide et Cie Librairies-Éditeurs.
9	1845		En el pueblo de Trévelez, se indica al mencionar sus productos que "allí se crían tomillos y manzanillas"	In the town of Trévelez, when mentioning its products, it is stated that “thyme and chamomile are grown there”.	Madoz 1845	Madoz P. 1986 (1845). Diccionario Geográfico-estadístico-Histórico de España y sus posesiones de ultramar. Facsímil. Ámbito de ediciones S.A. Valladolid.
10	1861		Se refiere a la especie, comentando también su abundancia en las cumbres	He refers to the species, also commenting on its abundance in the summits.	Willkomm & Lange 1861-1880	Willkomm, H.M. & Lange, J. (1861-1880). Prodromus florae Hispanicae seu synopsis methodica omnium plantarum in Hispania sponte nascentium vel frequentius cultarum quae innotuerunt. I, II & III. Stuttgartiae: Sumtibus E. Schweizerbart (E. Koch).
11	1861		"...alli se halla esa rica manzanilla silvestre, la manzanilla de la sierra, especie rara…solo huele a humedad mientras no se hecha en infusión, pero que al contacto del agua hirviendo deja sorprender sus aromas, mucho más penetrantes que los de la manzanilla de los jardines y desenvuelve su misteriosos y benéfico poder contra las fiebres y otras dolencias".	“...there you can find that rich wild chamomile, the chamomile of the sierra, a rare species...it only smells damp as long as it is not infused, but when in contact with boiling water its aromas are much more penetrating than those of the chamomile of the gardens and it unleashes its mysterious and beneficial power against fevers and other illnesses”.	news	Sierra Nevada, una expedición al pico Veleta desde el balneario de Lanjarón. La España, nº4446, 1 febrero de 1861
12	1861		"…volvimos a encontrar la manzanilla como primera señal de vegetación y nos acordamos de las tercianas…hagamos, pues, provisión de manzanilla"	“...we found chamomile again as the first sign of vegetation and we remembered the tertians...so let's make a supply of chamomile.”		Sierra Nevada, una expedición al pico Veleta desde el balneario de Lanjarón. La España, nº4451, 7 febrero de 1861
13	1872		"...se vendía en Granada con el nombre de manzanilla de la Sierra"	“...it was sold in Granada under the name of manzanilla de la Sierra”	Amo y Mora 1872	Amo y Mora M. 1872. Flora fanerogámica de la Península Ibérica. Tomo IV. Granada
14	1882	137	"… la manzanilla real Artemisia granatensis Boiss. Una hierba diminuta, plateada, existente en campo de hierba muy espesos, de la familia de las artemisias o hierbas de San Juan que como hierba medicinal, es muy conocida por los serranos…."	“... the royal chamomile Artemisia granatensis Boiss. A tiny, silvery herb, existing in very thick grass field, of the family of the artemisias or Saint John's wort that as a medicinal herb, is well known by the inhabitants of the Sierra....”	Willkomm 1882	Willkomm, M. 1882. Aus den Hochgebirgen von Granada: Naturschilderungen, Erlebnisse und Erinnerungen/ von Moritz Willkomm, nebst granadinischen Volkssagen und Märchen. Wien Druck und Verlag von Carl Gerold's Sohn. Wien.
15	1899		"En la provincia de Granada la variedad vegetal más conocida y apreciada es sin duda la manzanilla real (Artemisia granatensis) una planta altamente aromática y muy popular como remedio para cualquier afección de estómago. Esta planta que crece entre los esquistos de las cumbres más altas, se puede comprar fácilmente por las calles de Granada"	“In the province of Granada the best known and most appreciated plant variety is undoubtedly the royal chamomile (Artemisia granatensis) a very aromatic plant and very popular as a remedy for any stomach ailment. This plant, which grows among the schist of the highest peaks, can be easily bought in the streets of Granada"	Rein 1899	Rein J.J. 1899. Beiträge zur kenntnis der Spanischen Sierra Nevada. Lechner, Wien.
16	1909		Comenta: “Si aquí indico esta especie, lo hago para señalar la guerra de exterminio que se le hace por los manzanilleros. Está condenada a desaparecer: no conozco planta en España ni región alguna que la monomanía o epidemia social esté con más furor encarnada en los naturales del país…" y "Yo dije al guía que la cultivasen para atender las demandas y así pudiera evitarse su exterminio” tambien c…	He states: “If I mention this species here, it is to point out the war of extermination to point out the war of extermination that is being by the manzanilleros. It is condemned to disappear: I know of no plant in Spain or any other region where monomania or social epidemic is more more fiercely incarnated in the natives of the country..." also "I told the guide to cultivate it to meet the demand…	Pau, 1909	Pau, C. 1909. Mi segunda visita a Sierra Nevada. Bol. Soc. Aragonesa Ci. Nat. 8: 104-124
17	1923	237	"...los manzanilleros, en busca de una artemisa especial, peculiar, al parecer, de Sierra Nevada, ya muy enrarecida, casi descastada, conservándose sólo en lugares casi inaccesibles á todo interés que no sea la conquista del pan, premio de todos los sudores". También narra la muerte de un manzanillero despeñado en el Mulhacén.	“...the manzanilleros [local name for Royal Chamomile collectors], in search of a special mugwort, peculiar, it seems, of Sierra Nevada, already very rarefied, almost worn out, preserved only in places almost inaccessible to any interest other than the conquest of bread, the prize of all the sweat”. He also narrates the death of a manzanillero fallen from the Mulhacén peak.	Bernaldo de Quirós, 1923	Bernaldo de Quirós C. 1923. Sierra Nevada. Publicaciones de la comisaría regia del turismo. Madrid.
18	1923	244	"...A las seis y media de la tarde essamos en el albergue. A los postres gusto una taza de manzanilla de Sierra Nevada. Es una bebida agradable, casi sin amargo."	“At half past six in the evening we were at the lodge. At dessert I enjoyed a cup of manzanilla de Sierra Nevada. It is a pleasant drink, almost without bitterness.”	Bernaldo de Quirós, 1923	Bernaldo de Quirós C. 1923. Sierra Nevada. ed. Publicaciones de la comisaría regia del turismo. Madrid.
19	1924		“...Como dijo Pau, es planta condenada a desaparecer, por la guerra que se le hace. En todas las comarcas vecinas de Sierra Nevada, lo mismo en Granada que en las Alpujarras y el Marquesado, goza de gran fama como hierba medicinal. Hasta los pastores de Dalias, que llegan con sus ganados a la sierra […] conocen la manzanilla real. Unos y otros son hoy, mejor que los llamados manzanilleros, los qu…	“...As Pau said, it is a plant condemned to disappear, due to the war that is being waged against it. In all the neighboring regions of Sierra Nevada, in Granada as well as in the Alpujarras and the Marquesado, it enjoys great fame as a medicinal herb. Even the shepherds of Dalias, who come with their cattle to the mountains [...] know the royal chamomile. Some and others are today, better than t…	Font Quer 1924	Font Quer, P. 1924. Datos acerca de la flora orófila de Sierra Nevada. Boletín de la Sociedad Aragonesa de Ciencias Naturales, 24: 238-244.
20	1959		"...Se emplea como medicinal «Manzanilla real de Sierra Nevada», por ello debe ser protegida y ordenada su recolección"	"It is used as medicinal “Royal Chamomile of Sierra Nevada”, so it must be protected and its collection ordered"	Rivas-Goday, 1959	Rivas Goday, S. 1959. Algunas especies raras o relicticas que deben protejerse en la Espana mediterránea. Revue d’Écologie, Sup, pp.95-101.
21	1971	182	"…desaparecida de Sierra Nevada por la avidez de los manzanilleros"	“...disappeared from the Sierra Nevada due to the greed of the chamomile collectors”	Prieto, 1971	Prieto, P. 1971. Vegetación de Sierra Nevada; la Cuenca del Monachil. Colección Monográfica Universidad de Granada, nº 11. Universidad de Granada. Granada
22	1978	10		"Species in the red data book of spcecial interest or value to to man; sources of economic products, past or present. Endangered due to continual collection…" "Today the plant is extremely difficult to find, but there is a still a strong desire to collect and it is not legally protected"	Synge, 1978	Synge, H. 1978. The IUCN Plant Red Data Book: comprising red data sheets on 250 selected plants threatened on a world scale. International Union for Conservation of Nature and Natural Resources. Unwin Bros., Ltd., UK.
23	1979		"...Desde hace algún tiempo se encuentra en vías de desaparición como consecuencia de la incesante búsqueda a la que ha sido sometida debido a sus propiedades medicinales"	"...For some time now it has been in the process of disappearing as a consequence of the incessant search to which it has been subjected due to its medicinal properties"	Martínez Parras et al. 1979	Martínez-Parras J.M, Molero J., Esteve-Chueca F. 1979. Notas sobre la provincia de Granada. Lagascalia 9(1): 51-64.
24	1979			They indicate propagation in nursery and planting with the result of "30 % mortality, which cannot be considered excessive"	Sáinz-Ollero & Hernández-Bermejo 1979	Sáinz-Ollero, H. & Hernández-Bermejo, E. 1979. Experimental reintroductions of endangered plant specie in their natural habitats in Spain. Biological Conservation, 16(3): 195-206.
25	1982		Incluida en el la legislación (Real Decreto 3091/1982 de 15 de Octubre sobre protección de especies amenazadas de la flora silvestre). Prohibido "...arranque, recogida, corte y desraizamiento de esta panta o parte de ella, incluídas sus semillas, así como su comercialización, excepto con fines científicos"	Included in the legislation (Real Decreto 3091/1982 of 15 October 1982 on the protection of endangered species of wild flora). Prohibited ‘...uprooting, collection, cutting and uprooting of this plant or part of it, including its seeds, as well as its commercialisation, except for scientific purposes’.	Anonymous	Anónimo. Real Decreto 3091/1982 de 15 de Octubre
26	1975	120	"Abundante en las regiones situadas a más de 3200 m de altitud… el hombre conocedor de sus propiedades medicinales, se aficionó a su sabor grato y natural, hasta buscarla con ahinco. Pronto se organizó un comercio intensivo favorecido por los altos precios que alcanzó en el mercado-4.000 pesetas últimamente. Por tal consecuencia está a punto de desaparecer de la superficie de la tierra"	"Abundant in the regions located at an altitude of more than 3200 m... man, aware of its medicinal properties, became fond of its pleasant and natural flavour, to the point of seeking it out with determination. Soon an intensive trade was organised, favoured by the high prices it reached on the market (4,000 pesetas lately). As a result, it is on the brink of disappearing from the surface of the …	Prieto, 1975	Prieto, P. 1975. Flora de la tundra de Sierra Nevada. Universidad de Granada. Granada.
27	1983	176	"En la actualidad hay reservas ocultas, que a veces, son descubiertas por los manzanilleros"	"At present, there are hidden reserves, which are sometimes discovered by Royal Chamomile harvesters"	Prieto, 1975	Prieto, P. 1975. Flora de la tundra de Sierra Nevada. Universidad de Granada. Granada.
28	1985		"En cuanto a su presencia y abundancia, tenemos que reconocer y decir, con gran pesar y nostalgia por nuestra parte, que cada día es más escasa, habiéndo supuesto en ocasiones para nosotros un verdadero esfuerzo (y récord de paciencia y tenacidad) el encontrarla"	"…as for its presence and abundance, we have to recognise and say, with great regret and nostalgia on our part, that it is becoming scarcer every day, and it has sometimes been a real effort (and a record of patience and tenacity) for us to find it’.	López-Guadalupe et al. 1985	López-Guadalupe, M., Sierra, C. & Marín-Calderón, G. 1985. Comunidades, habitat y tipos de suelos sobre los que se desarrolla la manzanilla de Sierra Nevada. Ars Pharmaceutica, 26(4): 255-263.
29	1986		"Se encuentra en trance de desaparación, dada la intensa y desordenada busqueda y recolección por parte de los "manzanilleros" en los últimos 50 años"	"It is on the verge of disappearing, given the intense and disorderly search and collection by the ‘manzanilleros’ over the last 50 years"	Pérez-Raya & Molero 1987	Pérez-Raya, F. & Molero J. 1987. Plantas medicinales de Sierra Nevada I. Ars Pharmaceutica, 27: 29-39.
30	1986		"Desde el punto de vista de su conservación, conviene hacer llegar a los recolectores de esta especie el peligro de su posible extinción. Especie protegida legalmente"	"From a conservation point of view, the collectors of this species should be made aware of the danger of its possible extinction. Legally protected species"	Losa & Jiménez 1986	Losa, J.M. & Giménez MA. 1986. Especies medicinales endémicas de Sierra Nevada. Ars Pharmaceutica 27(4): 381-386.
31	1987	114	Especie muy perseguida y amenazada. La presión constante a la que está sometida tiene varios orígenes: A) botánicos y aficionados, b) recolectores de plantas medicinales, c) particulares conocedores de la existencia de la planta, de gran fama en la región. A la que hay que añadir la especiel predilección que por ella siente la Capra hispanica	"A highly prosecuted and endangered species. The constant pressure to which it is subjected has various origins: A) botanists and enthusiasts, b) collectors of medicinal plants, c) private individuals who know of the existence of the plant, which is very famous in the region. To which must be added the special predilection of the Capra hispanica for it"	Gómez-Campo, 1987	Gómez-Campo, C. 1987. Libro rojo de especies vegetales amenazadas de España peninsular e islas Baleares. (C. Gómez Campo, Ed.). Ministerio de Agricultura, Pesca y Alimentación. ICONA. Serie Técnica. Madrid
32	1989		"...posteriormente,aún con las restricciones y medidas de protección, la venta solo se ha realizado de forma ocasional. Los elevados precios que ha alcanzado, de hasta 10.000 pesetas por kg en el año 1984 son indicativos de su demanda en el mercado"	"...subsequently, even with the restrictions and protective measures, sales have taken place only occasionally. The high prices it has reached, up to 10,000 pesetas per kg in 1984, are indicative of its demand in the market"	González-Tejero, 1989	Gonzáñez-Tejero, M.R. 1989. Investigaciones etnobotánicas en la provincia de Granada. Tesis doctoral. Facultad de Farmacia. Universidad de Granada.
33	1991	150	"En la actualidad,….la manzanilla de Sierra Nevada es una especie que solo se encuentra en los sitios más inaccesibles, donde apenas llega el hombre"	"Nowadays, ...., the Sierra Nevada chamomile is a species that is only found in the most inaccessible places, where man can hardly reach it"	Blanca, 1991; Blanca & Valle 1991	Blanca, G. 1991. Joyas Botánicas de Sierra Nevada. La Madraza. Granada.	Blanca, G. & Valle, F. 1991. Las plantas endémicas de AndalucíaOriental, IV: Artemisia granatensis. Monografias de Flora y Ve-getación Béticas 6: 23-27
34	1991		Micropropagación de Artemisia granatensis	Micropropagation of Artemisia granatensis	Clemente et al 1991	Clemente, M., Contreras, P., Susin J., Pliego-Alfaro F., 1991. Micropropagation of Artemisia granatensis. HortScience, 26(4): 420.
35	1998		"En peligro crítico (CR), con menos de 3000 individuos"	"Critically Endangered (CR), with less than 3,000 individuals"	Blanca et al. 1998	Blanca, G., Cueto, M., Martínez Lirola, M.J. y Molero, J. 1998. Threatened vascular flora of Sierra Nevada (Southern Spain). Biological Conservation, 85, 269–285.
36	1999		"...en pleno verano, una tercera ola formada por los recolectores de manzanilla y otras plantas medicinales y aromáticas que, por encima de donde pastan los rebaños, subían hasta las crestas (Sorre, 1931)"	"...in midsummer, a third wave formed by the collectors of camomile and other medicinal and aromatic plants who, above where the herds graze, climbed up to the ridges (Sorre, 1931)"	Bosque-Maurel 1999	Bosque-Maurel J. 1999. El hombre y el medio en Sierra Nevada (Andalucía) Crisis y cambio. Estudios Geográficos, 235: 207-247.
37	1999		"La especie sigue siendo recolectada por los lugareños, pues se ha constatado que existen bares que proporcionan la infusión, a la vez que aumentan las medidas de protecciòn y disminuye el número de individuos en distintas poblaciones"	"The species continues to be collected by local people, as it has been found that there are bars that provide the infusion, at the same time protection measures are increasing and the number of individuals in different populations is decreasing"	Blanca et al. 1999	Blanca, G., Cabezudo, B., Hernández-Bermejo, E., Herrera, C.M., Molero-Mesa, J., Muñoz, J. & Valdés, B. 1999. Libro Rojo de la Flora Silvestre Amenazada de Andalucía.Tomo I: Especiesen Peligro de Extinción. Sevilla.
38	2002		"Aunque está terminantemente prohibida, la recolección de la especie para preparar infusiones sigue siendo el principal factor de amenaza. Y eso a pesar de que sus virtudes medicinales no sonsuperiores a las de la manzanilla común, la zahareña o la zamarrilla"	"Although strictly prohibited, the collection of the species for infusions is still the main threat factor. This is despite the fact that its medicinal virtues are not superior to those of common camomile, zahareña or zamarrilla"	Blanca et al. 2002	Blanca, G. (ed.). 2002.Flora amenazada y endémica de Sierra Nevada. Granada
39	2002		"...6 poblaciones y <3000 individuos en 1998 a 12 poblaciones y <3500 individuos en 2000"	"...6 populations and <3000 individuals in 1998 to 12 populations and <3500 individuals in 2000"	Blanca et al. 2002	Blanca, G., Lorite, J. & Algarra, J. A. (2002). Estudio y conservación de la flora amenazada de Sierra Nevada. Pp.: 43-62. In: Barea, J. M., Ballesteros, E., Luzón, J. M., Moleón, M., Tierno, J. M. & Travesí, R. (eds.) Biodiversidad y conservación de fauna y flora en ambientes mediterráneos. Copias Coca. Granada. 359 Pp.
40	2003	10	"la manzanilla de Sierra Nevada es una especie a punto de extinguirse (en peligro crítico, según las categorías UICN, 2001), con un número de individuos reproductores inferior a 2.000, que solo se encuentra en los sitios más inaccesibles, y que se sigue recolectando a pesar de que está protegida desde 1982"	"Sierra Nevada chamomile is a species on the verge of extinction (critically endangered, according to IUCN categories, 2001), with less than 2,000 mature individuals, found only in the most inaccessible sites, and still collected despite being protected since 1982"	Blanca, 2003	Blanca G. 2003. El ruedo ibérico y la manzanilla de Sierra Nevada. Conservación Vegetal 8: 10-11.
41	2003	124	"Actualmente se conocen 10 poblaciones en las cumbres granadinas y una en la zona almeriense. En el pasado fue citada en mayor número de localidades, pero actualmente presenta una severa fragmentación"..."El número de individuos contabilizados para este estudio no sobrepasó los 500 ejemplares, pero debe ser algo mayor (aunque inferior a los 2.000)"	"Currently there are currently 10 known populations on the summits of Granada and one in the Almería area. In the past it was cited in a greater number of localities, but is now very fragmented"... "The number of individuals counted for this study does not exceed 500 specimens, but must be somewhat higher (although less than 2,000)"	Hernández-Bermejo et al 2003	Hernández-Bermejo, E., Contreras, P., Clemente, M. & Prados, J. 2003. Artemisia granatensis Boiss. In: Bañares, A., Blanca, G.,Güemes, J., Moreno, J.C. & Ortiz, S. (eds.). Atlas y libro rojo dela flora vascular amenazada de España. Pp: 124-125. Madrid.
42	2006		"Es planta muy apreciada popularmente como medicinal. Pese a que es planta protegida, se sigue recolectando. Creemos que la única solución ante el peligro de extinción en que se encuentra esta manzanilla, dadas las pocas poblaciones que aún quedan vivas, es en primer lugar concienciar a la población que lleva siglos consumiéndola y ofrecerles una alternativa que sea esta misma manzanilla de…	"It is a plant that is very appreciated popularly as a medicinal plant. Despite the fact that it is a protected plant, it is still being harvested. We believe that the only solution to the risk of extinction of this chamomile, given the few populations that are still alive, is first of all to raise awareness among the population that has been consuming it for centuries and offer them an alternati…	Pardo de Santayana, M. & Morales 2006	Pardo de Santayana, M. & Morales. 2006. Manzanillas ibéricas: Historia y usos tradicionales. Revista de Fitoterapia. 6 (2): 143-153
43	2006			It is well known that Artemisia granatensis, a narrow endemic from Sierra Nevada (Granada), is a critically endangered species as a result of over-collection	Tardío et al. 2006	Tardío, J., Pardo de Santayana, M., & Morales, R. 2006. Ethnobotanical review of wild edible plants in Spain. Botanical Journal of the Linnean Society, 152(1), 27–71. https://doi.org/10.1111/j.1095-8339.2006.00549.x
44	2007		"2000 individuos y 12 poblaciones"	"2000 individuals and 12 populations"	Lorite et al 2007	Lorite, J., Navarro, F. B., & Valle, F. (2007). Estimation of threatened orophytic flora and priority of its conservation in the Baetic range (S. Spain). Plant Biosystems, 141(1), 1–14. https://doi.org/10.1080/11263500601153560
45	2009		[Referido a España] "El número de especies de plantas amenazadas crece un 6% en ocho años. El total se eleva así a 1.221 tipos, 278 de ellos en peligro de extinción y otros 308 en estado crítico. 308 'críticamente amenazadas', al borde de la extinción, por ejemplo el drago canario, la manzanilla real de Sierra Nevada, la orquídea zueco -o zapatito de dama-, o el abeto andaluz llamado pinsapo"	[Referred to Spain] "The number of endangered plant species has grown by 6% in eight years. This brings the total to 1,221 species, of which 278 are endangered and 308 are critically endangered. 308 ‘critically endangered’, on the verge of extinction, for example the Canary Island dragon tree, the royal chamomile of Sierra Nevada, the clog orchid, or the Andalusian fir tree called pinsapo"	news	Ideal, 11 enero 2009
46	2009		"La manzanilla de Sierra Nevada (Artemisia granatensis) en los años 60 fue casi esquilmada por que se le atribuían grandes propiedades medicinales. Esta ha sido la causa de que esté en peligro de extinción"	"In the 1960s, the Sierra Nevada chamomile (Artemisia granatensis) was almost plundered because it was considered to have great medicinal properties. This is the reason for its endangered status"	Valle et al. 2009	Valle F., Cañadas, E, Montoya M.C. (2009). Utilización de recursos botánicos como ejemplo de desarrollo sostenible: estudio de un caso concreto en la región mediterránea. Ambientalia: Medio Rural y Sostenibilidad. IV Congreso Andaluz de Desarrollo Sostenible. VIII Congreso Andaluz de Ciencias Ambientales: 5-12.
47	2010		"El delegado de Medio Ambiente de Granada, Francisco Javier Aragón, ha asegurado este martes que las obras de la Universiada de invierno que se celebrarán en 2015 no están afectando a las especies autóctonas de Sierra Nevada , algo que denunció la asociación Ecologistas en Acción. Ante la denuncia en la que se criticaba que en las obras se estaba "machacando" la manzanilla, una especie en peligro…	"The delegate of Environment of Granada, Francisco Javier Aragón, has assured this Tuesday that the works of the winter Universiade to be held in 2015 are not affecting the native species of Sierra Nevada, something that was denounced by the association Ecologistas en Acción. In response to the complaint that the works were ‘crushing’ the manzanilla, a species in danger of extinction, Aragón stat…	news	Ideal, 10 august 2010
48	2010		"...Estos colectivos [referido a grupos ecologistas] han denunciado que las excavadores "están abriendo kilómetros de zanjas y moviendo miles de toneladas de tierra , arrasando sabinares, manzanilla de la Sierra y todo lo que encuentran a su paso"	These groups [referrecd to ecologist groa grupos ecologistas] have denounced that the diggers ‘are opening kilometres of trenches and moving thousands of tons of earth, razing savin groves, manzanilla de la Sierra and everything in their path’.	news	Ideal, 19 agosto 2010
49	2011			"Threatened by collection for medicinal use"	Biltz et al 2011	Bilz, M., Kell, S.P., Maxted, N. and Landown, R.V. 2011. European Red List of Vascular Plants. Publications Office of the European Union. Luxembourg.
50	2011			"The result of these pressures is a major decrease in seed set(decreasing 20-90 % of the total seed set, dependingon the population; author’s unpublished data"	Peñas et al. 2011	Peñas, J., Lorite, J., Alba-Sánchez, F. y Taisma, A. (2011). Self-incompatibility, floral parameters, and pollen characterization in the narrow endemic and threatened species Artemisia granatensis (Asteraceae). Anales del Jardín Botánico de Madrid, 68(1), 97–105.
51	2011			"The population size is thought to be higher, although less than 2,000 individuals. Comparing previous census (1994), a decrease in the number of mature adults of more than 50% can be observed up to the year 2003, as well as the disappearance of some subpopulations"	Hernández-Bermejo et al. 2003	Hernández-Bermejo, J.E., Contreras, P., Clemente, M. & Prados, J. 2011. Artemisia granatensis. The IUCN Red List of Threatened Species 2011: e.T162057A5526184.
52	2012		"Un equipo científico de la UGR investiga las propiedades de una planta que se utiliza en la Alpujarra como remedio contra dolencias estomacales en forma de infusión"	"A scientific team from the UGR [University of Granada] investigates the properties of a plant used in the Alpujarra as a remedy for stomach ailments in the form of an infusion"	news	Ideal, 25 junio 2012
53	2013			We have successfully cultivated A. granatensis in artificial systems (plants in artificial soil and transformed in vitro roots) to generate enough plant biomass	González-Coloma, A. et al. 2013	González-Coloma, A., Díaz, C. E., Barrero, A. Herrador, A.F., González-Portero, M., Arteaga, A. Burón, P., Burillo, J. (2013). Biotechnological production of biopesticides of botanical origin. VI Reunión Química Orgánica del Mediterráneo (VI REQOMED).
54	2014		Datos sobre el aprovechamiento y la conservación de la especie	Data on the use and conservation of the species	Benítez et al. 2014	Benítez, G., Mesa, J. M., & Gonzalez-Tejero, M. R. (2014). Artemisia granatensis Boiss. In M. Pardo de Santayana, R. Morales, L. Aceituno, & M. Molina (Eds.), Inventario Español de los conocimientos tradicionales relativos a relativos a la biodiversidad (pp. 123–125). Ministerio de Agricultura, Alimentación y Medio Ambiente. https://doi.org/10.13140/2.1.2687.5685
55	2015		"...Denuncian que las excavadoras están abriendo kilómetros de zanjas y moviendo miles de toneladas de tierra, arrasando sabinares, manzanilla de la Sierra y todo lo que encuentran a su pas"	"...They report that bulldozers are digging kilometres of trenches and moving thousands of tonnes of soil, razing savin groves, royal chamomile and everything in their path"	news	Ideal, 19 agosto 2015
56	2015		"La manzanilla de la Sierra vuelve a convertirse en víctima de recolectores furtivos, paseantes y turistas. Este año, vigilantes ambientales y botánicos del Parque Nacional han detectado una importante disminución de las poblaciones de Artemisia granatensis, cuando ya se pensaba que la especie podría iniciar un camino hacia la recuperación. «Todos los años se produce recolección clandestina e inc…	"The Royal chamomile has once again become the victim of illegal collectors, passers-by and tourists. This year, rangers and botanists at the National Park have detected a significant decline in the populations of Artemisia granatensis, when it was thought that the species might be on way to recovery. ‘Every year there is clandestine harvesting and even cutting by visitors to the Sierra, but the …	news	Ideal, 7 septiembre 2015
57	2015			Potential hybridization with other Artemisia species (e.g. Artemisia umbelliformis)	Gómez et al. 2015	Gómez, J.M., González-Megías, A., Lorite, J., Abdelaziz, M., & Perfectti, F. 2015. The silent extinction: climate change and the potential hybridization-mediated extinction of endemic high-mountain plants. Biodiversity and Conservation, 24(8), 1843–1857. https://doi.org/10.1007/s10531-015-0909-5
58	2016		"Crean una reserva genética con un millar de plantas que se espera duplicar en solo un año, con el objetivo de conseguir muestras de las poblaciones de toda la sierra y mantener las características genéticas que ayuden a su reproducción"	‘They create a genetic reserve with a thousand plants that is expected to double in just one year, with the aim of obtaining samples of the populations of the entire sierra and maintaining the genetic characteristics that help reproduction".	news	Ideal, 18 abril 2016
59	2018		[Referido a las especies más conocidas de sierra Nevada en una encuesta a alumnos de secundaria de Granada] "Las más nombradas en este caso fueron manzanilla, estrella de las nieves, romero y valeriana".	[Referred to the best-known species of the Sierra Nevada in a survey of secondary school pupils in Granada] ‘The most frequently mentioned in this case were camomile, estrella de las nieves, rosemary and valerian’.	Rams & Pla-Pueyo 2018	Rams, S. & Pla-Pueyo, S. 2018. ¿Qué saben sobre Biología y Geología de Sierra Nevada (España) los estudiantes del Grado en Educación Primaria de la Universidad de Granada?. 28 Encuentros de Didáctica de las Ciencias Experimentales: 1331-1336.
60	2019		"1320 individuos y <20 poblaciones"	"1320 individuals and <20 populations"	Gutiérrez et al. 2019	Gutierrez Carretero, L., Fuentes Carretero, J., Cueto Romero, M.; Blanca López, G. 2019. Top Ten de las plantas más amenazadas de Andalucía Oriental: Taxones endémicos y no endémicos. Acta Botanica Malacitana,44: 5–33. https://doi.org/10.24310/abm.v44i0.5636
61	2019		"Artemisia granatensis Boiss. (Figura 6a), taxón que en ausencia de recolección sería abundante, pero que está en peligro de extinción (EN) por la continua presión a la que se ve sometido por la recolección ilegal de plantas completas". Cultivada en jardín Botánico desde 2015 "cuenta con una población ex-situ de 200 individuos"	"Artemisia granatensis Boiss (Figure 6a), a taxon that would be abundant in the absence of collection, but is endangere (EN) due to the continuous pressure to which it is subjected by the illegal collection of whole plants". Cultivated in the Botanic Garden since 2015 "it has an ex-situ population of 200 individuals"	Lorite et al. 2019	Lorite J, Ruiz M, Plaza L. (2019). Conservación Ex situ e in Situ. Pp: 225-265. In : Peñas J, Lorite J. 2019. Biología de la conservación de plantas en Sierra Nevada: Principios y retos para su preservación. Editorial Universidad de Granada. Granada. 432 pp.

## Sheet: Hoja2
clemente et al 1991. Hortscience 26(4): 420.
